# Supplementary material for: A study on the hydrogen activation properties of Ni-based intermetallics: a relationship between reactivity and the electronic state
Source: Royal Society of Chemistry journal article supplement (doi:10.1039/c4cp01514b), 2014-06-20
Supplement: c4cp01514b1.pdf [file c4cp01514b1.pdf]

## Supporting Information

### Study on Hydrogen Activation Properties of Ni-Based Intermetallics: Relationship between Reactivity and Electronic State

Shinya Furukawa,<sup>\*,†</sup> Kengo Ehara,<sup>‡</sup> Kenichi Ozawa,<sup>‡</sup>  
and Takayuki Komatsu<sup>\*,‡</sup>

<sup>†</sup>*Department of Chemistry,* <sup>‡</sup>*Department of Chemistry and Materials Science,  
Graduate School of Science and Engineering, Tokyo Institute of Technology,  
2-12-1-E1-10, Ookayama, Meguro-ku, Tokyo 152-8551, Japan*

*E-mail: furukawa.s.af@m.titech.ac.jp,*

*Tel: +81-3-5734-2602, Fax: +81-3-5734-2758*

*E-mail: komatsu.t.ad@m.titech.ac.jp,*

*Tel: +81-3-5734-3532, Fax: +81-3-5734-2758*

## Experimental details

### Catalyst preparation

Ni based intermetallic compounds ( $\text{Ni}_3\text{M}$ ,  $\text{M} = \text{Ge}, \text{Nb}, \text{Sn}, \text{Ta}, \text{and Ti}$ ) were prepared by arc melting of a mixture of Ni (Soekawa Chemical, 99.9%) and the second metal (Soekawa Chemical, 99.9%) under an argon atmosphere. The resultant ingots were crushed in air and filtered into particles with diameters below 25  $\mu\text{m}$ . Powders of pure Ni were also filtered into particles with similar diameters.

### Characterization

The crystal structure of the prepared intermetallics was examined by powder X-ray diffraction (XRD) with a Rigaku RINT2400 using an X-ray source of Cu  $\text{K}\alpha$ . X-ray photoelectron spectra (XPS) of the intermetallics were recorded with an ULVAC PHI 5000 VersaProbe spectrometer. The catalyst was pressed into a pellet and placed into a quartz reactor, where it was reduced under flowing hydrogen (50  $\text{mlmin}^{-1}$ ) at 873 K for 1 h. The reduced catalyst was transferred to the spectrometer without being exposed to air. Spectra were obtained with an Al  $\text{K}\alpha$  X-ray source using C 1s as a reference for binding energy. d band center ( $C_d$ ) was defined as the position of the vertical line bisecting the area of d band. The number of exposed Ni was estimated by CO pulse adsorption. Prior to the measurement, the catalyst was reduced under flowing  $\text{H}_2$  (60  $\text{mlmin}^{-1}$ ) at 1073 K for 0.5 h, followed by He (60  $\text{mlmin}^{-1}$ ) at 1073 K for 1 h to remove adsorbed hydrogen. After cooling to room temperature, a specific amount CO(5%)/He pulse was introduced to the catalyst bed and passed (unadsorbed) CO was measured by a TCD detector.

### $\text{H}_2\text{-D}_2$ equilibration

$\text{H}_2\text{-D}_2$  equilibration was carried out with a glass flow and circulation system connected with a quadrupole mass spectrometer (Spectra International, MICROVISION). Prior to each reaction, the catalyst was pretreated under 15 kPa of hydrogen at 873 K for 1 h and evacuated at 298 K for 10 min. A mixture of  $\text{H}_2$  (2.5 kPa) and  $\text{D}_2$  (2.5 kPa) was then circulated through the catalyst at a certain reaction temperature and the formation of HD was monitored by mass spectrometry. The fraction of HD ( $f_{\text{HD}}$ ) was calculated by the following equation:  $f_{\text{HD}} = P_{\text{HD}} / (P_{\text{H}_2} + P_{\text{D}_2} + P_{\text{HD}})$ . To eliminate the contribution of HD initially contained as an impurity of  $\text{D}_2$ ,  $f_{\text{HD}}$  was calibrated into  $\Delta f_{\text{HD}}$  as follows:  $\Delta f_{\text{HD}} = f_{\text{HD}} - f_{\text{HD}}^0 = P_{\text{HD}} / (P_{\text{H}_2} + P_{\text{D}_2} + P_{\text{HD}}) - P_{\text{HD}}^0 / (P_{\text{H}_2}^0 + P_{\text{D}_2}^0 + P_{\text{HD}}^0)$ , where superscript zero indicates each value at 0 min. The reaction rate ( $r / \text{min}^{-1}$ ) was estimated by the slope of  $\Delta f_{\text{HD}}$  (identical to that of  $f_{\text{HD}}$ ) within a linear region. After 10 min of the reaction, the catalyst was evacuated and the temperature was changed, followed by introduction of a mixture of  $\text{H}_2$  (2.5 kPa) and  $\text{D}_2$  (2.5 kPa) for the next reaction. This procedure was repeated to obtain the Arrhenius plot. Catalyst amount was controlled so that  $\Delta f_{\text{HD}}$  reached 0.1~0.4 at 10 min: Ni (10 mg),  $\text{Ni}_3\text{Ge}$  (50 mg),  $\text{Ni}_3\text{Nb}$  (100 mg),  $\text{Ni}_3\text{Sn}$  (100 mg),  $\text{Ni}_3\text{Ta}$  (200 mg), and  $\text{Ni}_3\text{Ti}$  (100 mg).

Table S1. Crystal structure parameters of Ni and Ni<sub>3</sub>M intermetallic compounds prepared in this study. <sup>a</sup>

| compound                                     | system       | space group          | <i>a</i>         | <i>b</i>         | <i>c</i>         | $\alpha$ | $\beta$  | $\gamma$   |
|----------------------------------------------|--------------|----------------------|------------------|------------------|------------------|----------|----------|------------|
| Ni<br>(ref: PDF#00-004-0850)                 | cubic        | Fm-3m                | 3.5262<br>3.5238 | 3.5262<br>3.5238 | 3.5262<br>3.5238 | 90<br>90 | 90<br>90 | 90<br>90   |
| Ni <sub>3</sub> Ge<br>(ref: PDF#00-035-1359) | cubic        | Pm-3m                | 3.5834<br>3.5720 | 3.5834<br>3.5720 | 3.5834<br>3.5720 | 90<br>90 | 90<br>90 | 90<br>90   |
| Ni <sub>3</sub> Sn<br>(ref: PDF#00-004-0850) | hexagonal    | P6 <sub>3</sub> /mmc | 5.2983<br>5.2961 | 5.2983<br>5.2961 | 4.2517<br>4.2481 | 90<br>90 | 90<br>90 | 120<br>120 |
| Ni <sub>3</sub> Ti<br>(ref: PDF#03-065-2038) | hexagonal    | P6 <sub>3</sub> /mmc | 5.1152<br>5.1010 | 5.1152<br>5.1010 | 8.3268<br>8.3067 | 90<br>90 | 90<br>90 | 120<br>120 |
| Ni <sub>3</sub> Ta<br>(ref: PDF#01-072-2595) | tetragonal   | I4/mmm               | 3.6341<br>3.6270 | 3.6341<br>3.6270 | 7.4555<br>7.4550 | 90<br>90 | 90<br>90 | 90<br>90   |
| Ni <sub>3</sub> Nb<br>(ref: PDF#00-015-0101) | orthorhombic | Pmmn                 | 5.1228<br>5.1060 | 4.2547<br>4.2510 | 4.5439<br>4.5560 | 90<br>90 | 90<br>90 | 90<br>90   |

<sup>a</sup> Calculated based on their XRD patterns. The reported values are also listed in the lower rows.

Table S2. The number of exposed Ni ( $N_{\text{Ni}^{ex}}$ )<sup>a</sup> and specific surface area of Ni and Ni<sub>3</sub>M.

| catalyst           | $N_{\text{Ni}^{ex}} / \mu\text{mol}\cdot\text{g}^{-1}$ | relative amount | $S_{\text{BET}} / \text{m}^2\cdot\text{g}^{-1}$ | relative amount |
|--------------------|--------------------------------------------------------|-----------------|-------------------------------------------------|-----------------|
| Ni                 | 0.21                                                   | 1.00            | 0.92                                            | 1.00            |
| Ni <sub>3</sub> Ge | 0.10                                                   | 0.48            | 1.44                                            | 1.57            |
| Ni <sub>3</sub> Nb | 0.054                                                  | 0.26            | 0.90                                            | 0.98            |
| Ni <sub>3</sub> Sn | 0.11                                                   | 0.52            | 0.86                                            | 0.94            |
| Ni <sub>3</sub> Ta | 0.059                                                  | 0.28            | 1.37                                            | 1.49            |
| Ni <sub>3</sub> Ti | 0.10                                                   | 0.47            | 0.37                                            | 0.41            |

<sup>a</sup> Measured by CO adsorption.

## Figures

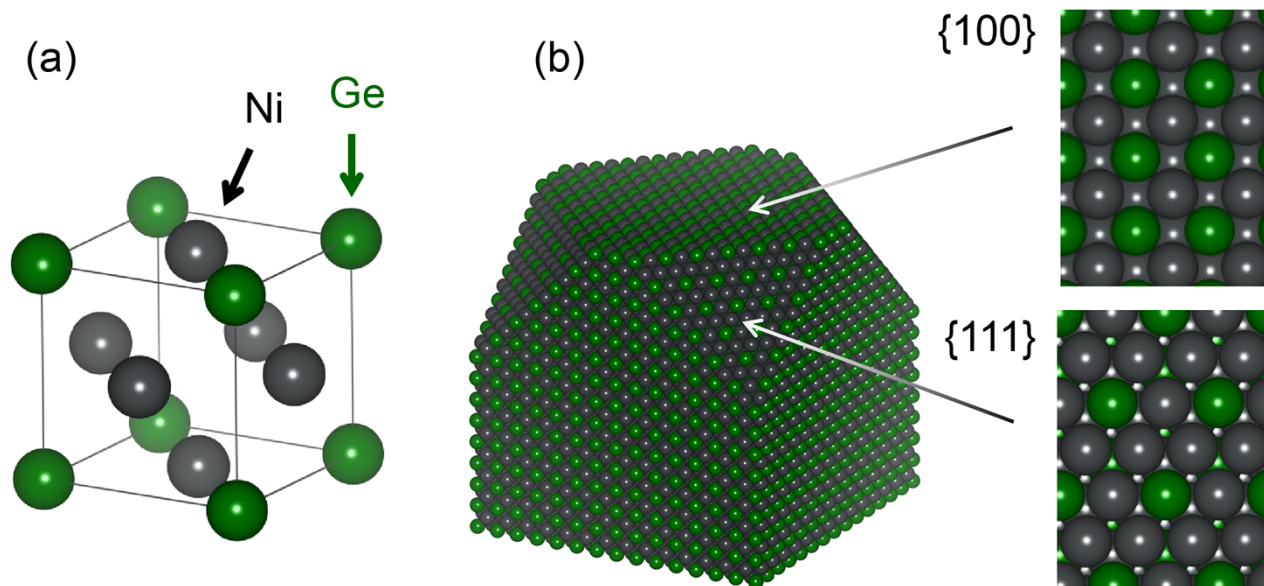

**Figure S1.** Crystal structure of Ni<sub>3</sub>Ge (ICSD: #53745) with (a) a single unit cell and (b) its truncated cube model exposing {100} and {111} planes.

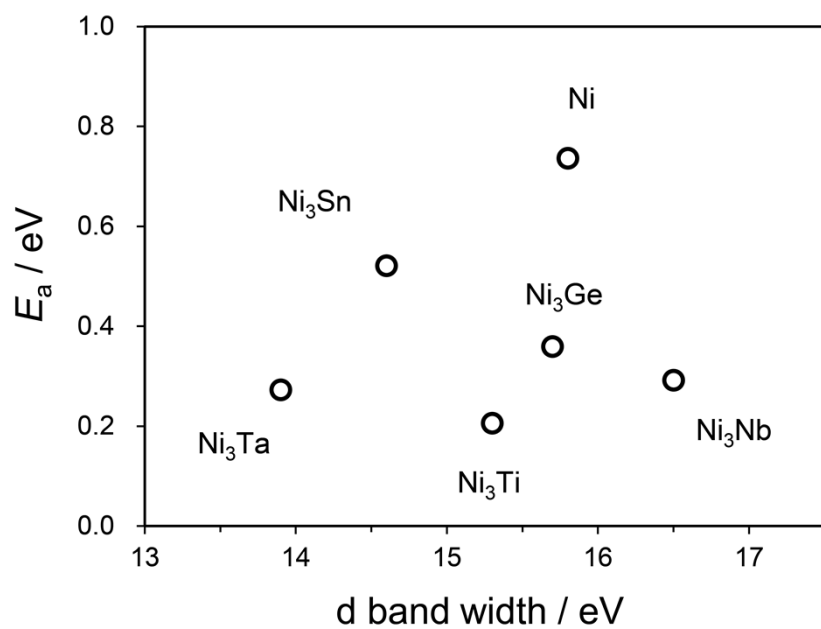

**Figure S2.** Correlation between  $E_a$  and d band width of Ni and Ni<sub>3</sub>M intermetallics.

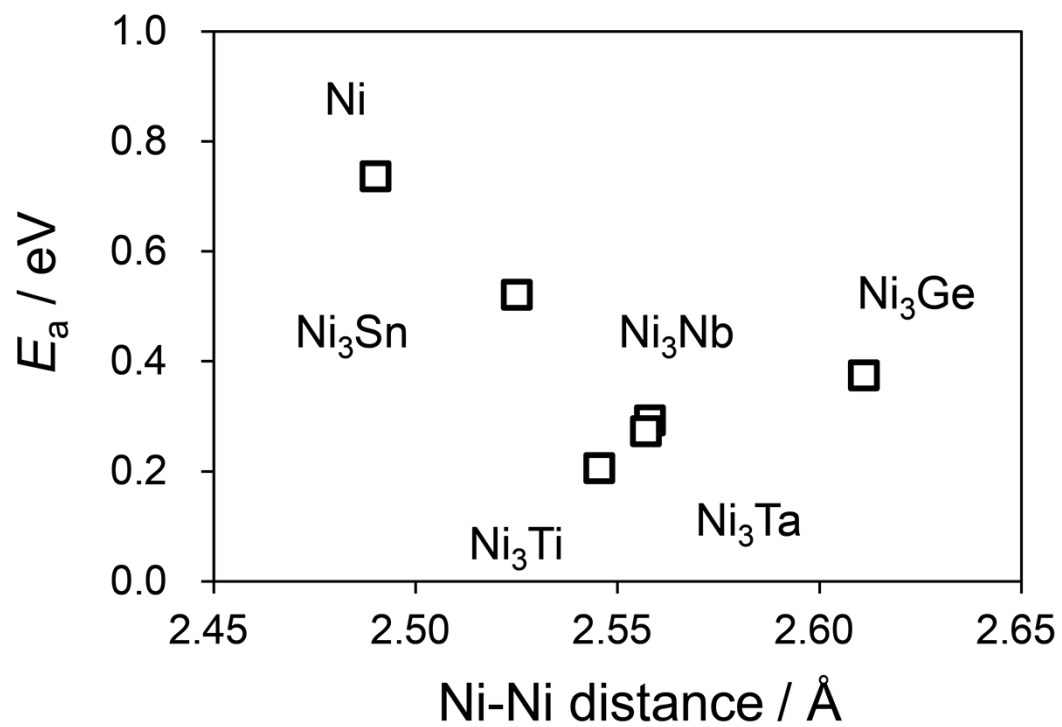

**Figure S3.** Correlation between  $E_a$  and the nearest Ni–Ni distance of Ni and Ni<sub>3</sub>M intermetallics.
